# Supplementary material for: The impact of cross-linker distribution on magnetic nanogels: encapsulation, transport and controlled release of the tracer
Source: Royal Society of Chemistry journal article supplement (doi:10.1039/d4sm00797b), 2024-01-01
Supplement: d4sm00797b3.pdf [file d4sm00797b3.pdf]

Cite this: DOI: 00.0000/xxxxxxxxxx

## Electronic Supplementary Information for "The Impact of Cross-Linker Distribution on Magnetic Nanogels: Encapsulation, Transport and Controlled Release of the Tracer."

Ivan S. Novikau,<sup>\*a</sup> Ekaterina V. Novak,<sup>b</sup> and Sofia S. Kantorovich<sup>a,c</sup>

Received Date  
Accepted Date

DOI: 00.0000/xxxxxxxxxx

### 1 Analysis of Bond Length Distributions

The energy of a bond is proportional to its length,  $l_{bond}$ . Hence, in Fig. 1a (right) we present the density distribution of normalized bond lengths within a specific morphology,  $\rho(\overline{l_{bond}})$ , where  $\overline{l_{bond}} = (l_{bond} - l_{bond,min}) / (l_{bond,max} - l_{bond,min})$ . This 'min-max' scaling is chosen to highlight the presence of highly stretched cross-linkers within nonuniform morphologies. Non-rescaled distributions,  $\rho(l_{bond})$ , are provided in Fig. 1a (left). A comparison between the plots in Fig. 1a reveals that rescaling only affects cross-linkers, meaning that the length of polymer backbone stretchable springs remains consistent across all morphologies. Additionally, the distribution of average bond length over a small shell distance  $r$  from the center of mass of the gel is presented in Fig. 1b. We once again observe that polymer  $l_{bond}$  remain constant throughout the gel's volume, while cross-linkers exhibit fluctuations. For instance, there is a peak for the gaussian morphology at the center of the gel. By correlating average  $l_{bond}$  for different morphologies with bond stretching energies,  $E_{bonded}$ , shown in Fig. 1c, we can infer that due to excluded volume interactions, it becomes challenging for cross-linkers to pack polymers into confined spaces, resulting in the stretching of cross-linkers.

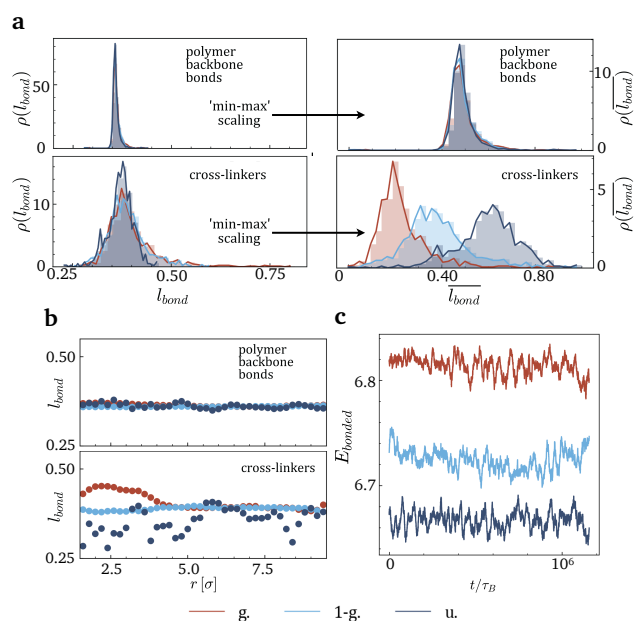

Fig. 1 a (left) Histograms of  $l_{bond}$  distributions for polymer backbone stretchable springs (FENE potentials) and cross-linkers (harmonic potentials). (right) Histograms of 'min-max' normalized bond length  $\overline{l_{bond}}$  for various morphologies. b Average  $l_{bond}$  as a function of the distance  $r$  from the center of mass of the MNG. c Energy of bonded interactions within various morphologies. Along the x-axis is the simulation time divided by the Brownian relaxation time of a MNP. Both  $l_{bond}$  and  $r$  are measured in units of bead diameter,  $\sigma$ .

### 2 Fitting Magnetisation Autocorrelation Functions (ACF)

As mentioned in the main text, the shape of the MNG ACFs is rather complex and required 10 stretched exponential functions  $e^{-t^\beta}$  for exponents  $0 < \beta < 2$  to fit them in a reliable way. We employed Differential Evolution algorithm in order to optimise

<sup>a</sup> Faculty of Physics, University of Vienna, Kolingasse 14-16, Vienna 1090, Austria E-mail: ivan.novikau@univie.ac.at

<sup>b</sup> Ural Federal University, Lenin Av. 51, Ekaterinburg 620000, Russian Federation

<sup>c</sup> Research Platform MMM, University of Vienna, Oskar-Morgenstern-Platz 1, Vienna 1090, Austria

the fitting. Obtained weights of the stretched exponentials are provided in the following three tables.

Table 1 gaussian

| $i$ | $f_i$        | $\tau_i$   | $\beta_i$   |
|-----|--------------|------------|-------------|
| 0   | 0.0313833796 | 668869.846 | 1.94976674  |
| 1   | 0.0571745925 | 27.3872559 | 0.553795715 |
| 2   | 0.0272604858 | 573313.803 | 0.218793286 |
| 3   | 0.122433377  | 673301.266 | 1.94916583  |
| 4   | 0.334049327  | 311.535839 | 0.451347345 |
| 5   | 0.0463671472 | 664291.87  | 1.94998642  |
| 6   | 0.113471535  | 11.6346341 | 0.776222096 |
| 7   | 0.0777341818 | 120532.938 | 1.94999992  |
| 8   | 0.0425189368 | 44376.0054 | 1.04497825  |
| 9   | 0.150850617  | 5.54432802 | 0.542271495 |

Table 2 1-gaussian

| $i$ | $f_i$        | $\tau_i$   | $\beta_i$   |
|-----|--------------|------------|-------------|
| 0   | 0.134381915  | 345126.302 | 1.94989022  |
| 1   | 0.052857027  | 1550.03396 | 0.747324177 |
| 2   | 0.132876636  | 7.2360366  | 0.594977791 |
| 3   | 0.116992815  | 29.1948474 | 1.63578785  |
| 4   | 0.0831295954 | 344203.601 | 1.94972976  |
| 5   | 0.0862043751 | 2.94987194 | 0.482914566 |
| 6   | 0.0580794413 | 38670.5705 | 1.38074828  |
| 7   | 0.103970802  | 1522.14379 | 0.62283344  |
| 8   | 0.0716531728 | 345811.168 | 1.94999376  |
| 9   | 0.162747132  | 158.250851 | 0.556393399 |

Table 3 uniform

| $i$ | $f_i$         | $\tau_i$   | $\beta_i$   |
|-----|---------------|------------|-------------|
| 0   | 0.0348141118  | 503704.753 | 1.95        |
| 1   | 0.0735062133  | 468.654362 | 1.75026195  |
| 2   | 0.00787281569 | 63653.0372 | 1.52948371  |
| 3   | 0.114478161   | 120.786526 | 0.280530386 |
| 4   | 0.1288664     | 89.9251735 | 1.53562632  |
| 5   | 0.0841476288  | 33.1085893 | 1.94994946  |
| 6   | 0.0808016172  | 3864.01534 | 0.422685835 |
| 7   | 0.223120481   | 503093.708 | 1.94998276  |
| 8   | 0.021686283   | 56871.6425 | 1.40049073  |
| 9   | 0.234999511   | 3.49137971 | 0.806357891 |

### 3 Tracer Diffusion

In order to obtain the escape time and the diffusion coefficients of the tracers we calculated the mean-squared displacement for the three considered morphologies, and field scenarios. The results are presented in the three figures below as indicated in the corresponding legends.

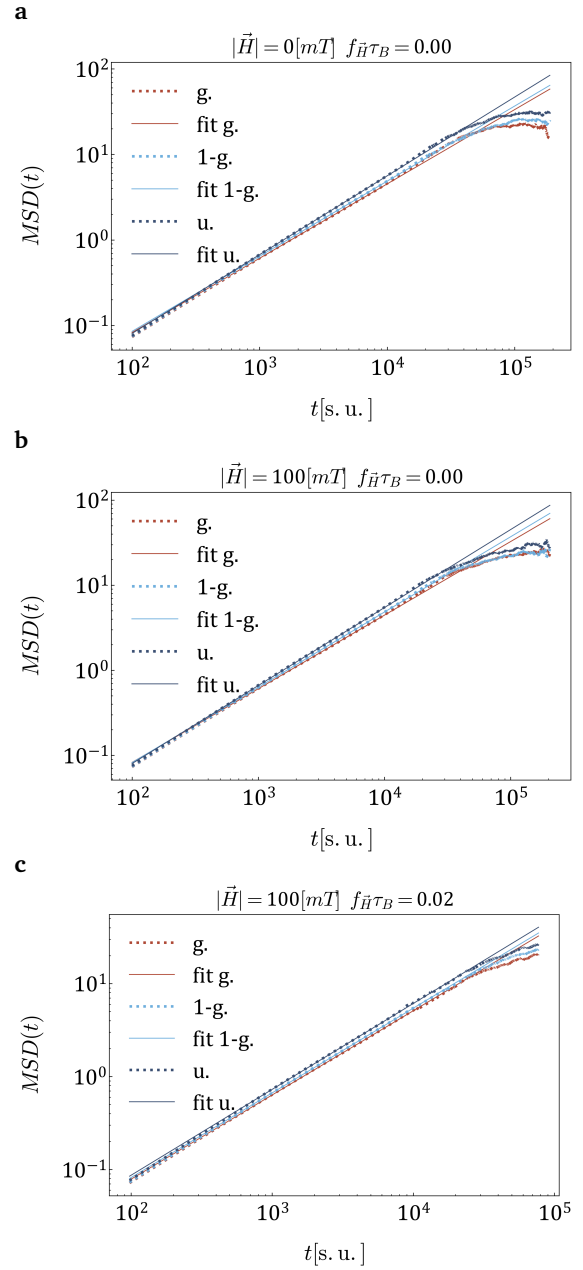

Fig. 2  $MSD(t)$  a Zero-field case. b Constant non-zero-field scenario. c Rotational-field situation.
